# Supplementary material for: Protein Phosphatase 1 Down Regulates ZYG-1 Levels to Limit Centriole Duplication
Source: PubMed Central journal article supplement (PMC5289615; doi:10.1371/journal.pgen.1006543), 2017-01-19

Supplemental Figure S3

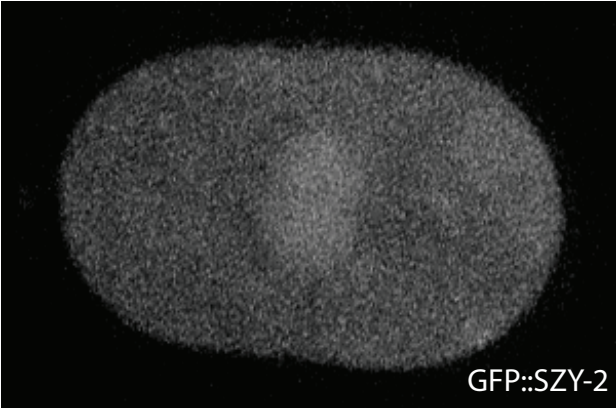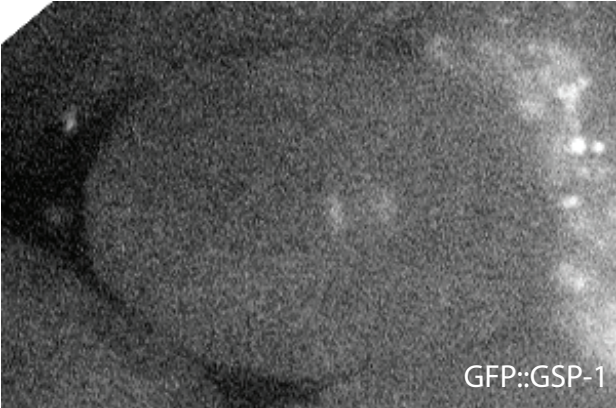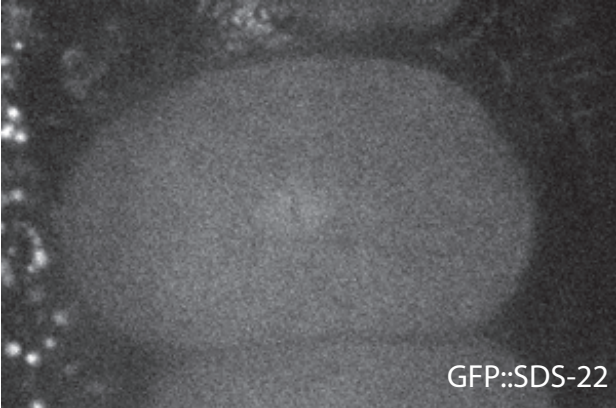

Supplement: pgen.1006543.s003.pdf [file pgen.1006543.s003.pdf]
